# Supplementary material for: Mutagenesis of CP43-arginine-357 to serine reveals new evidence for (bi)carbonate functioning in the water oxidizing complex of Photosystem II
Source: Royal Society of Chemistry journal article supplement (doi:10.1039/b507519j), 2005-11-08
Supplement: b507519j.pdf [file b507519j.pdf]

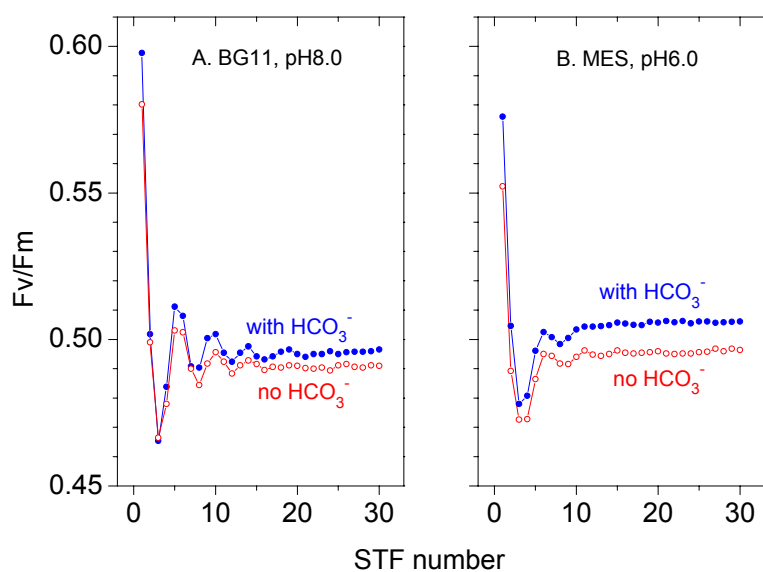

Figure S1. Effect of 10 mM  $\text{HCO}_3^-$  on  $F_v/F_m$  in *Synechocystis* PCC 6803 cells measured by laser-based fast repetition rate fluorometer (laser-FRRF) at 100Hz flash rate using single turnover flashes.

A – Measurements were done in BG-11 medium (pH 8.0);

B – Measurements were done in 50 mM MES-NaOH buffer (pH 6.0), 35 mM NaCl and 300 mM sucrose.

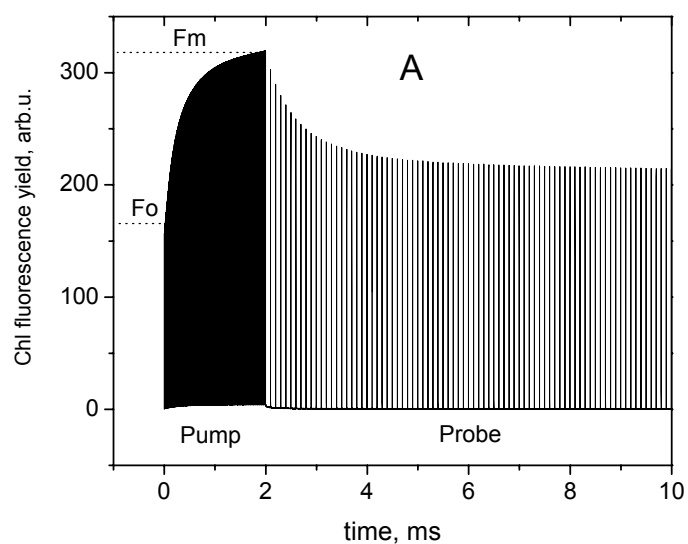

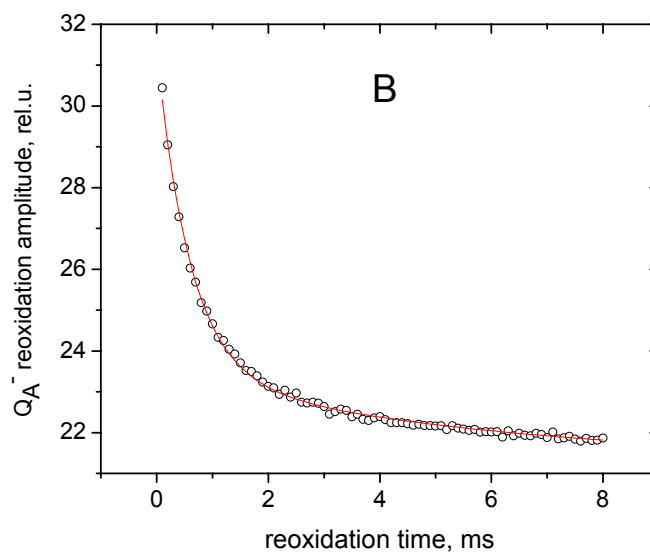

Figure S2. Basis for measurements of  $Q_A^-$  reoxidation lifetime in *Synechocystis* WT (A) cells by FRR laser fluorometer in “pump and probe” mode. Strong laser pump pulses reduced  $Q_A$  to  $Q_A^-$  during 2 ms. After that weak probe pulses monitored  $Q_A^-$  decay from 2 to 10 ms. Ratio of time duration pump/probe pulses is equal to 300/1. Decay kinetics (B) was integrated (circles) and fitted to exponential decay equation (red solid line) for obtaining  $Q_A^-$  reoxidation lifetime. Data in Table 1 (article) presents average results of 3200 consecutive measurements with a dark time between measurements of 10 s.
